# Supplementary material
Source: HighWire-hosted journal article supplement (https://svn.smart01.highwire.org/content/svn-2020-000387)
Supplement: inline-supplementary-material-1 [file inline-supplementary-material-1.pdf]

**Supplemental Figure 1. Patients flow chart**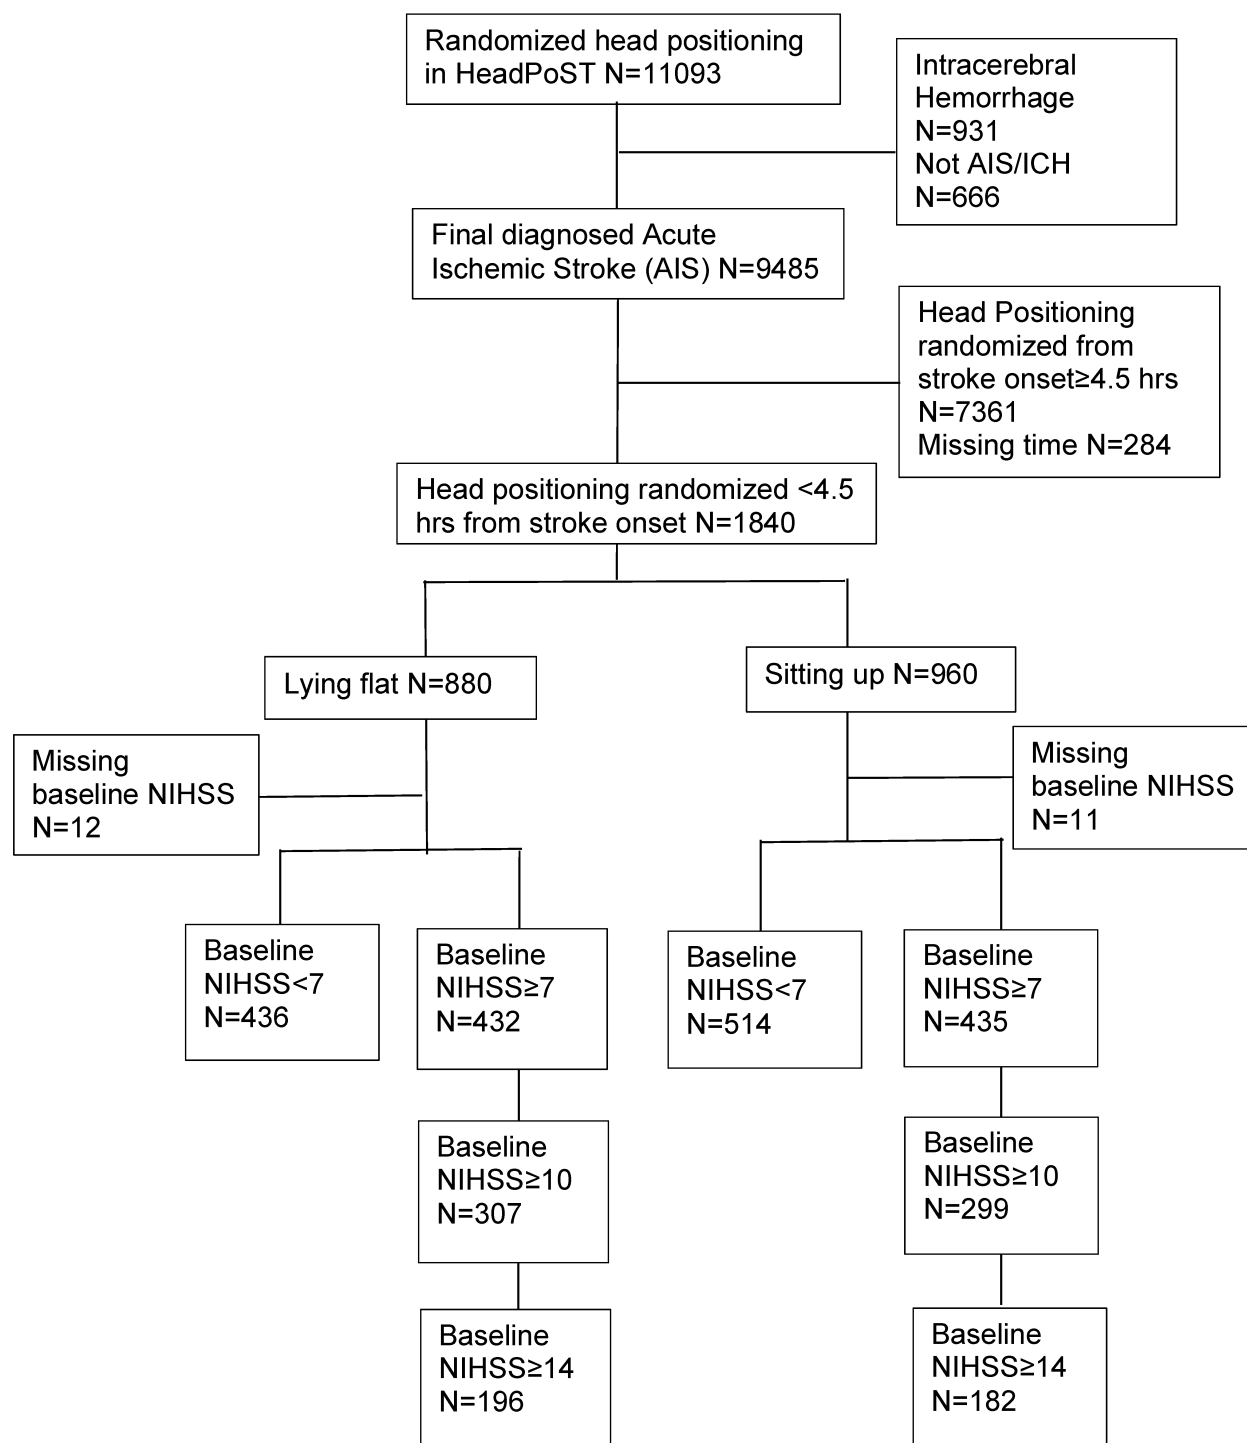

**Supplemental Figure 2. Subgroup analysis of ordinal mRS outcome by LVO in NIHSS cohorts**

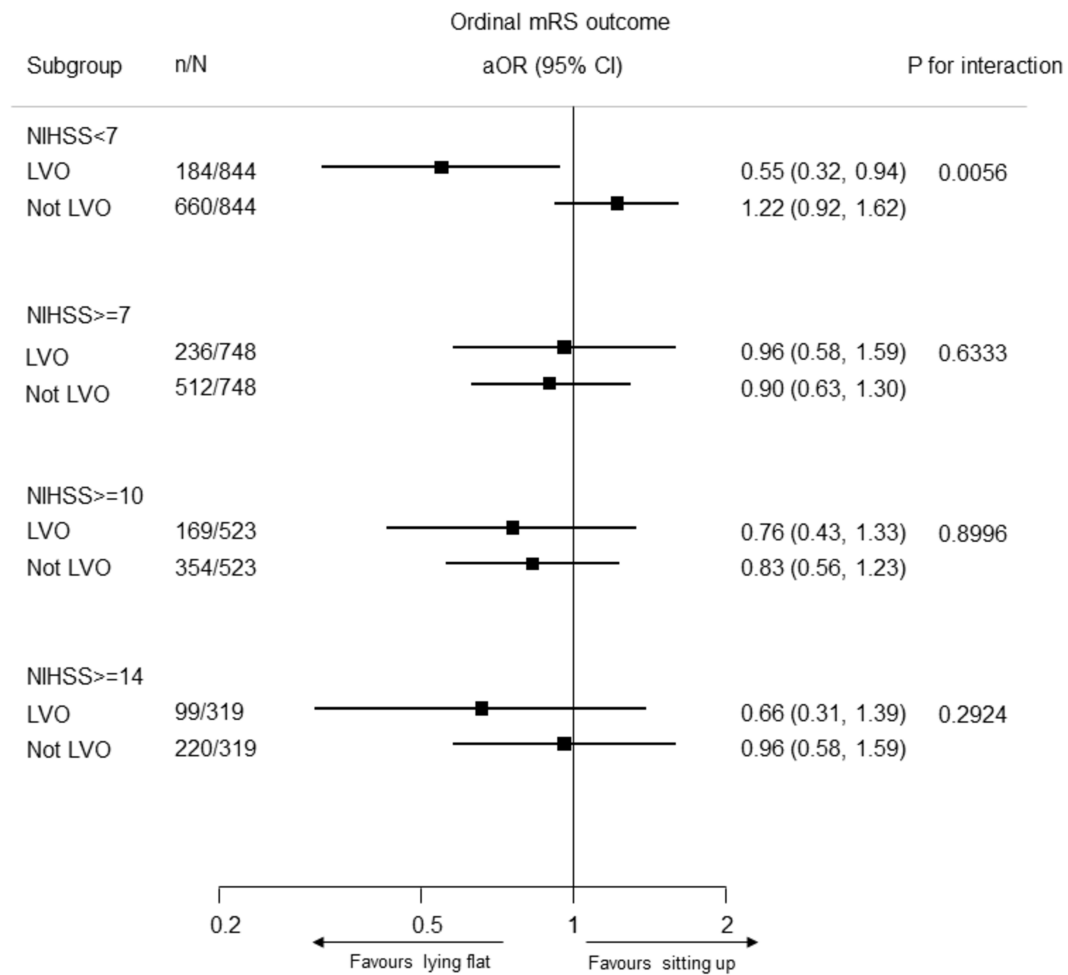

Note: aOR donates adjusted odds ratio, mRS modified rankin scale, NIHSS national institute of health stroke scale, LVO large vessel occlusion Hierarchical mixed model adjusted study design, age, sex, NIHSS at baseline as continuous, pre-morbid function according to mRS and medical history of heart disease, stroke or diabetes mellitus.

**Supplemental Table 1: Baseline characteristics by head positioning within 4.5 hours from stroke onset and NIHSS <7 points**

| <b>Baseline characteristics</b>  | <b>Lying flat<br/>N=436</b> | <b>Sitting up<br/>N=514</b> | <b>P value</b> |
|----------------------------------|-----------------------------|-----------------------------|----------------|
| <b>Age (years)</b>               | 67.7 (13.3)                 | 68.1 (12.5)                 | 0.56           |
| <b>Male</b>                      | 274 (62.8%)                 | 336 (65.4%)                 | 0.42           |
| <b>Region, n(%)</b>              |                             |                             | 0.18           |
| Australia and UK                 | 217 (49.8%)                 | 279 (54.3%)                 |                |
| China and Taiwan                 | 167 (38.3%)                 | 190 (37.0%)                 |                |
| India and Sri Lanka              | 9 (2.1%)                    | 4 (0.8%)                    |                |
| South America                    | 43 (9.9%)                   | 41 (8.0%)                   |                |
| <b>Hypertension, n(%)</b>        | 257 (58.9%)                 | 326 (63.5%)                 | 0.15           |
| <b>Previous stroke, n(%)</b>     | 99 (22.8%)                  | 114 (22.2%)                 | 0.83           |
| <b>Atrial fibrillation, n(%)</b> | 45 (10.4%)                  | 58 (11.3%)                  | 0.64           |
| <b>Heart failure, n(%)</b>       | 7 (1.6%)                    | 16 (3.1%)                   | 0.13           |
| <b>Diabetes Mellitus, n(%)</b>   | 89 (20.4%)                  | 114 (22.2%)                 | 0.50           |
| <b>Current smoker, n(%)</b>      | 79 (18.5%)                  | 108 (21.4%)                 | 0.27           |
| <b>Aspirin use, n(%)</b>         | 174 (39.9%)                 | 235 (45.8%)                 | 0.07           |
| <b>Anticoagulant use, n(%)</b>   | 33 (7.6%)                   | 52 (10.1%)                  | 0.17           |
| <b>AIS category, n(%)</b>        |                             |                             | 0.53           |
| Large Vessel                     | 90 (20.6%)                  | 125 (24.3%)                 |                |
| Cardioembolic                    | 61 (14.0%)                  | 68 (13.2%)                  |                |
| Lacunar                          | 153 (35.1%)                 | 164 (31.9%)                 |                |
| Other                            | 132 (30.3%)                 | 157 (30.5%)                 |                |
| <b>NIHSS at admission</b>        | 3.0 (2.0, 5.0)              | 3.0 (2.0, 5.0)              | 0.71           |
| <b>mRS, n(%)</b>                 |                             |                             | 0.97           |
| 0 (no symptoms)                  | 285 (65.4%)                 | 336 (65.4%)                 |                |
| 1 (no significant disability)    | 83 (19.0%)                  | 100 (19.5%)                 |                |
| 2 (slight disability)            | 44 (10.1%)                  | 46 (8.9%)                   |                |
| 3 (moderate disability)          | 19 (4.4%)                   | 25 (4.9%)                   |                |
| 4 (moderate/severe disability)   | 5 (1.1%)                    | 7 (1.4%)                    |                |
| 5 (severe disability)            | 0 (0.0%)                    | 0 (0.0%)                    |                |

*Note: AIS denotes Acute Ischaemic Stroke, IQR interquartile range, mRS modified Rankin Scale, NIHSS National Institution of Health Stroke Scale, SD standard deviation*

**Supplemental Table 2: Baseline characteristics by head positioning within 4.5 hours from stroke onset and NIHSS  $\geq 10$  points**

| <b>Baseline characteristics</b>  | <b>Lying flat<br/>N=307</b> | <b>Sitting up<br/>N=299</b> | <b>P value</b> |
|----------------------------------|-----------------------------|-----------------------------|----------------|
| <b>Age (years)</b>               | 74.4 (13.0)                 | 73.8 (13.8)                 | 0.55           |
| <b>Male</b>                      | 148 (48.2%)                 | 141 (47.2%)                 | 0.80           |
| <b>Region, n(%)</b>              |                             |                             | 0.10           |
| Australia and UK                 | 219 (71.3%)                 | 191 (63.9%)                 |                |
| China and Taiwan                 | 56 (18.2%)                  | 71 (23.7%)                  |                |
| India and Sri Lanka              | 8 (2.6%)                    | 4 (1.3%)                    |                |
| South America                    | 24 (7.8%)                   | 33 (11.0%)                  |                |
| <b>Hypertension, n(%)</b>        | 210 (69.1%)                 | 184 (61.5%)                 | 0.05           |
| <b>Previous stroke, n(%)</b>     | 70 (22.9%)                  | 72 (24.1%)                  | 0.73           |
| <b>Atrial fibrillation, n(%)</b> | 77 (25.4%)                  | 71 (23.9%)                  | 0.67           |
| <b>Heart failure, n(%)</b>       | 27 (8.9%)                   | 24 (8.1%)                   | 0.72           |
| <b>Diabetes Mellitus, n(%)</b>   | 65 (21.2%)                  | 45 (15.1%)                  | 0.05           |
| <b>Current smoker, n(%)</b>      | 35 (11.7%)                  | 39 (13.1%)                  | 0.60           |
| <b>Aspirin use, n(%)</b>         | 94 (30.7%)                  | 101 (33.8%)                 | 0.42           |
| <b>Anticoagulant use, n(%)</b>   | 46 (15.0%)                  | 33 (11.1%)                  | 0.15           |
| <b>AIS category, n(%)</b>        |                             |                             | 0.80           |
| Large Vessel                     | 101 (32.9%)                 | 92 (30.8%)                  |                |
| Cardioembolic                    | 86 (28.0%)                  | 80 (26.8%)                  |                |
| Lacunar                          | 25 (8.1%)                   | 30 (10.0%)                  |                |
| Other/uncertain                  | 95 (30.9%)                  | 97 (32.4%)                  |                |
| <b>NIHSS at admission</b>        | 16.0 (12.0, 20.0)           | 15.0 (12.0, 21.0)           | 0.55           |
| <b>mRS, n(%)</b>                 |                             |                             | 0.90           |
| 0 (no symptoms)                  | 162 (53.3%)                 | 155 (52.2%)                 |                |
| 1 (no significant disability)    | 60 (19.7%)                  | 56 (18.9%)                  |                |
| 2 (slight disability)            | 31 (10.2%)                  | 31 (10.4%)                  |                |
| 3 (moderate disability)          | 31 (10.2%)                  | 33 (11.1%)                  |                |
| 4 (moderate/severe disability)   | 18 (5.9%)                   | 17 (5.7%)                   |                |
| 5 (severe disability)            | 2 (0.7%)                    | 5 (1.7%)                    |                |

*Note: AIS denotes Acute Ischaemic Stroke, IQR interquartile range, mRS modified Rankin Scale, NIHSS National Institute of Health Stroke Scale, SD standard deviation*

**Supplemental Table 3: Baseline characteristics by head positioning within 4.5 hours from stroke onset and NIHSS  $\geq$  14 points**

| Baseline characteristics         | Lying flat<br>N=196 | Sitting up<br>N=182 | P value |
|----------------------------------|---------------------|---------------------|---------|
| <b>Age (years)</b>               | 75.5 (12.7)         | 75.1 (14.1)         | 0.79    |
| Male                             | 87 (44.4%)          | 84 (46.2%)          | 0.74    |
| <b>Region, n(%)</b>              |                     |                     | 0.16    |
| Australia and UK                 | 148 (75.5%)         | 120 (65.9%)         |         |
| China and Taiwan                 | 29 (14.8%)          | 35 (19.2%)          |         |
| India and Sri Lanka              | 5 (2.6%)            | 4 (2.2%)            |         |
| South America                    | 14 (7.1%)           | 23 (12.6%)          |         |
| <b>Hypertension, n(%)</b>        | 134 (69.1%)         | 116 (63.7%)         | 0.28    |
| <b>Previous stroke, n(%)</b>     | 42 (21.5%)          | 47 (25.8%)          | 0.33    |
| <b>Atrial fibrillation, n(%)</b> | 46 (23.8%)          | 47 (26.1%)          | 0.61    |
| <b>Heart failure, n(%)</b>       | 19 (9.8%)           | 16 (8.9%)           | 0.76    |
| <b>Diabetes Mellitus, n(%)</b>   | 45 (23.1%)          | 28 (15.4%)          | 0.06    |
| <b>Current smoker, n(%)</b>      | 17 (8.9%)           | 25 (13.9%)          | 0.13    |
| <b>Aspirin use, n(%)</b>         | 62 (31.8%)          | 60 (33.0%)          | 0.81    |
| <b>Anticoagulant use, n(%)</b>   | 28 (14.4%)          | 20 (11.0%)          | 0.33    |
| <b>AIS category, n(%)</b>        |                     |                     | 0.78    |
| Large Vessel                     | 63 (32.1%)          | 54 (29.7%)          |         |
| Cardioembolic                    | 61 (31.1%)          | 53 (29.1%)          |         |
| Lacunar                          | 12 (6.1%)           | 15 (8.2%)           |         |
| Other                            | 60 (30.6%)          | 60 (33.0%)          |         |
| <b>NIHSS at admission</b>        | 19.0 (16.0, 22.0)   | 19.0 (16.0, 23.0)   | 0.70    |
| <b>mRS, n(%)</b>                 |                     |                     | 0.48    |
| 0 (no symptoms)                  | 94 (48.5%)          | 90 (49.7%)          |         |
| 1 (no significant disability)    | 43 (22.2%)          | 31 (17.1%)          |         |
| 2 (slight disability)            | 17 (8.8%)           | 22 (12.2%)          |         |
| 3 (moderate disability)          | 25 (12.9%)          | 23 (12.7%)          |         |
| 4 (moderate/severe disability)   | 14 (7.2%)           | 11 (6.1%)           |         |
| 5 (severe disability)            | 1 (0.5%)            | 4 (2.2%)            |         |

*Note: AIS denotes Acute Ischaemic Stroke, IQR interquartile range, mRS modified Rankin Scale, NIHSS National Institute of Health Stroke Scale, SD standard deviation*
